# Supplementary material for: EpitoCore: Mining Conserved Epitope Vaccine Candidates in the Core Proteome of Multiple Bacteria Strains
Source: PubMed Central journal article supplement (PMC7214623; doi:10.3389/fimmu.2020.00816), 2020-05-05

IEDB antigens rate (%)

40

30

20

10

Surfaceome 15mers

Epitocore

minimum Set

Datasets

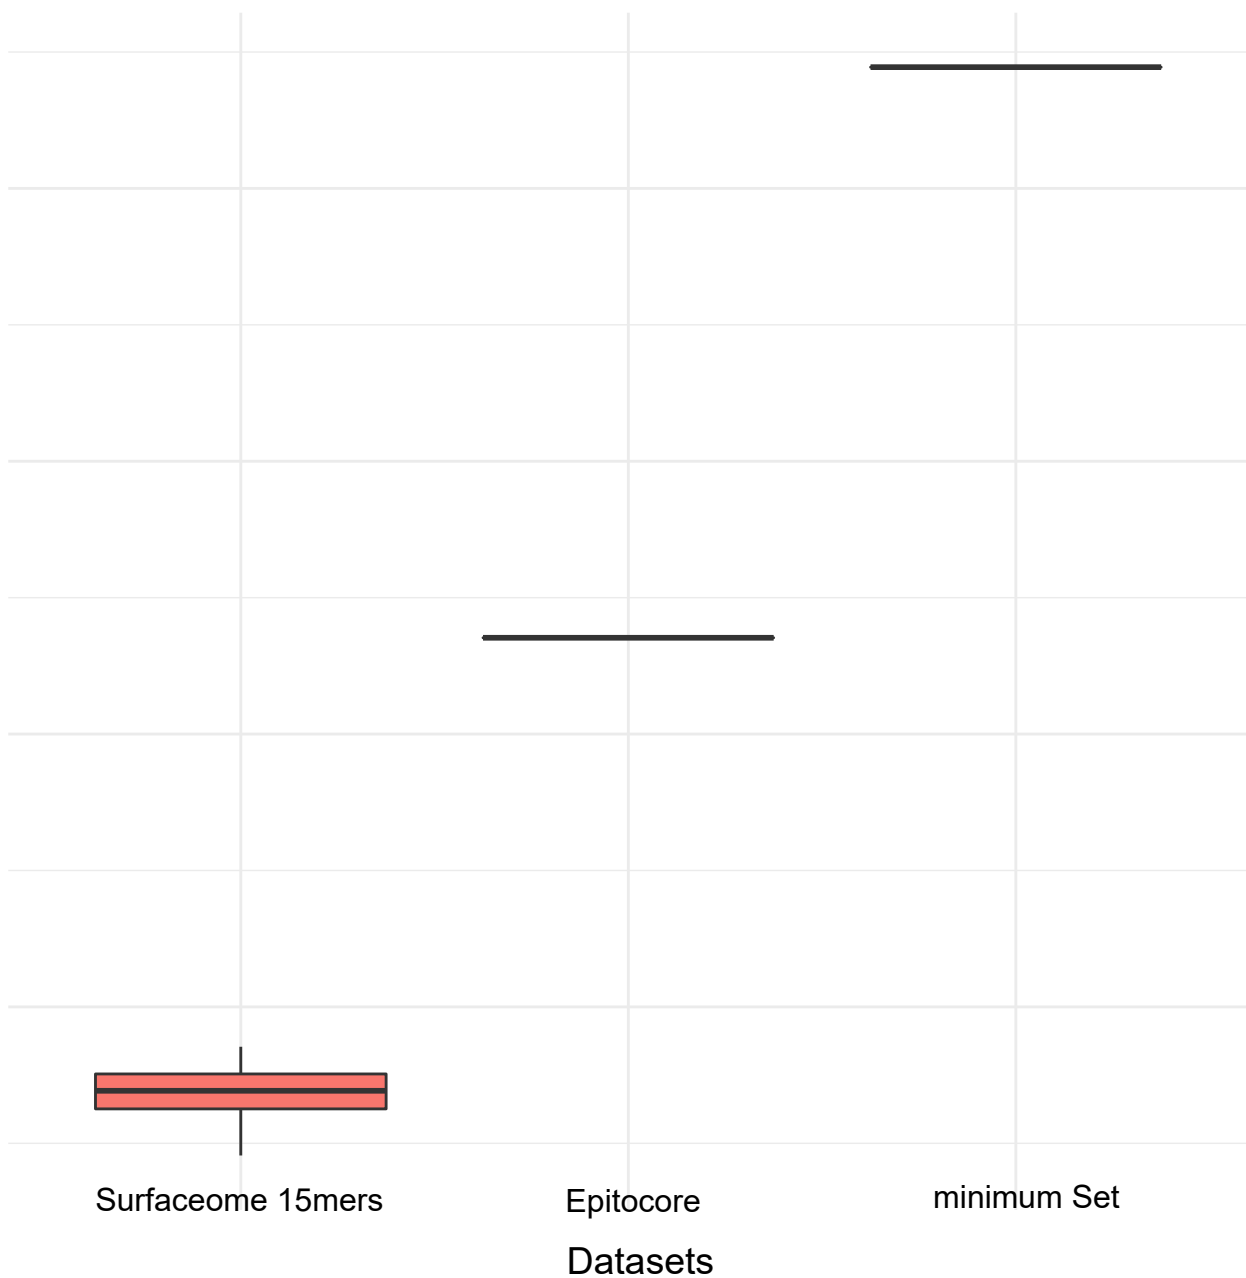

Supplement: Image_1.pdf [file Image_1.pdf]
