# Supplementary material for: EpitoCore: Mining Conserved Epitope Vaccine Candidates in the Core Proteome of Multiple Bacteria Strains
Source: PubMed Central journal article supplement (PMC7214623; doi:10.3389/fimmu.2020.00816), 2020-05-05
Supplement: Table_1.pdf [file Table_1.pdf]

Supplementary Table I - Number of proteins predicted per step

| <b>STRAIN</b> | <b>PROTEOME</b> | <b>TMHMM*</b> | <b>SHP</b> | <b>PSORT</b> |
|---------------|-----------------|---------------|------------|--------------|
| TH135         | 4800            | 481           | 211        | 83           |
| OCU901s       | 4569            | 496           | 192        | 84           |
| HP17          | 4561            | 490           | 197        | 87           |
| OCU873s       | 4499            | 475           | 198        | 82           |
| OCU464        | 4754            | 481           | 191        | 81           |
| H87           | 4969            | 509           | 203        | 83           |
| MAC109        | 4841            | 497           | 209        | 87           |

\*Predicted transmembrane proteins after SHP removal
